# Supplementary material
Source: Springer Nature journal article supplement (https://www.springermedizin.de/resource/supplementary/12879_2008_664_MOESM3_ESM.pdf/9449458)
Supplement: MOESM3 [file 9449458]

**Table 1 – Demographic characteristics in 81 subjects.**

| Characteristic                       | Patients with:         |               | Total         |
|--------------------------------------|------------------------|---------------|---------------|
|                                      | Proven or Probable IPA | No IPA        |               |
| <b>Sex:</b>                          |                        |               |               |
| Male                                 | 7                      | 42            | 49            |
| Female                               | 6                      | 26            | 32            |
| <b>Age (years):</b>                  |                        |               |               |
| Median                               | 60.91                  | 50.40         | 53.68         |
| Range                                | 37.09 – 73.39          | 17.97 – 72.45 | 17.97 – 73.39 |
| <b>Transplant type:</b>              |                        |               |               |
| Allogeneic                           | 6                      | 40            | 46            |
| Autologous                           | 2                      | 12            | 14            |
| Non-Transplant                       | 5                      | 16            | 21            |
| <b>Underlying disease:</b>           |                        |               |               |
| ALL (Acute Lymphoblastic Leukemia)   | 0                      | 8             | 8             |
| AML (Acute Myeloid Leukemia)         | 4                      | 12            | 16            |
| AMM (Agnogenic Myeloid Metaplasia)   | 1                      | 2             | 3             |
| AMML (Acute Myelomonocytic Leukemia) | 0                      | 4             | 4             |
| CLL (Chronic Lymphocytic Leukemia)   | 0                      | 3             | 3             |
| CML (Chronic Myeloid Leukemia)       | 0                      | 7             | 7             |
| HD (Hodgkin's Disease)               | 1                      | 6             | 7             |
| NHL (Non Hodgkin's Lymphoma)         | 1                      | 8             | 9             |
| MM (Multiple Myeloma)                | 3                      | 4             | 7             |
| RA (Refractory Anemia)               | 1                      | 6             | 7             |
| Other                                | 2                      | 8             | 10            |
